# Supplementary material
Source: publisher figshare collection journal article supplement (https://gsapubs.figshare.com/articles/dataset/_/20134178)
Supplement: Supplementary file 1 [file 1]

Liang Liu, Jie-Hua Yang, Li-Fang Kang, Hong Zhong, and Xing-Chun Zhang, 2022, The long-lived transcrustal magmatic systems of Southeast China in response to paleo-Pacific plate subduction, recorded by the Cretaceous volcanic sequences in southeastern Zhejiang Province: GSA Bulletin, <https://doi.org/10.1130/B36448.1>.

## Supplemental Material

**Table S1.** Zircon LA-ICP-MS U–Pb dating results of the volcanic rocks in SE Zhejiang Province.

**Table S2.** Trace elements (ppm) in zircon from the volcanic rocks in SE Zhejiang Province acquired by LA-ICP-MS.

**Table S3.** Major element contents (wt%) of volcanic rocks in SE Zhejiang Province.

**Table S4.** Trace and rare earth element (ppm) analyses of volcanic rocks in SE Zhejiang Province.

**Table S5.** Zircon in-situ Hf isotopic compositions from the volcanic rocks in SE Zhejiang Province.

**Table S6.** Zircon in-situ O isotopic compositions from the volcanic rocks in SE Zhejiang Province.
